# Supplementary material
Source: PubMed Central journal article supplement (PMC3120096)
Supplement: NIHMS299343-supplement-Supplementary.pdf [file NIHMS299343-supplement-Supplementary.pdf]

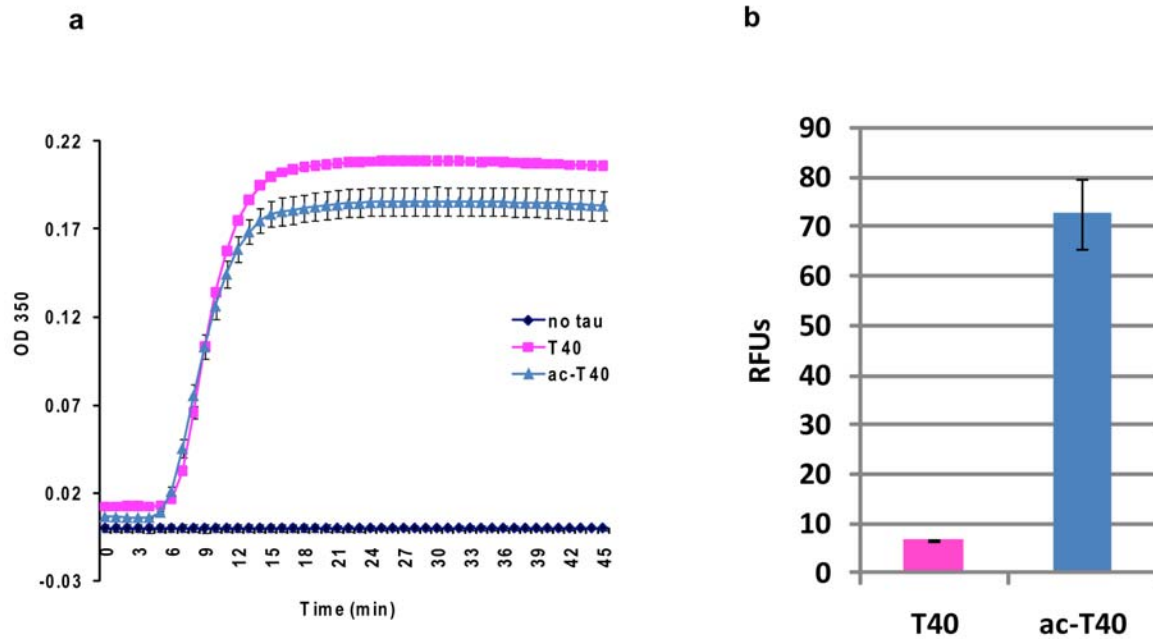

**Supplementary Figure S1: Tau T40 acetylation impairs MT assembly and promotes PHF aggregation *in vitro*.**

**a)** MT assembly activities of either unmodified or acetylated T40 proteins were evaluated in light scattering assays similar to that shown in Figure 1. 30  $\mu\text{M}$  tubulin monomers were mixed with 15  $\mu\text{M}$  tau proteins in MT assembly (RA) buffer supplemented with 2 mM guanosine triphosphate (GTP). MT assembly was determined by monitoring absorbance every minute at 350 nm using a SpectraMax plate reader. **b)** 15  $\mu\text{M}$  tau proteins were evaluated in fibrillization reactions using 10  $\mu\text{M}$  heparin to induce assembly for 3 days, at which point samples were incubated with 12.5  $\mu\text{M}$  ThT. These results were confirmed from  $n=4$  independent experiments. Error bars indicate standard error of the mean (SEM).

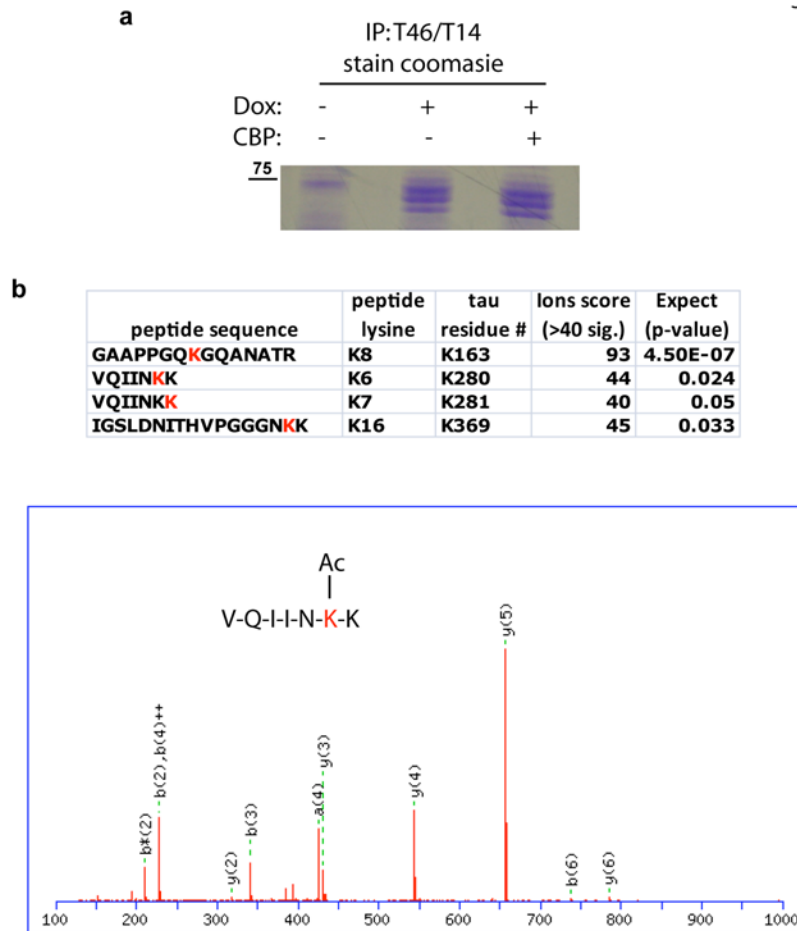

**Supplementary Figure S2: Mass spectrometry analysis identified K280 as a tau acetylation site in HEK-T40 cells.** **a)** HEK-T40 cells treated with Dox were transfected with vector alone or CBP and T40 was immunoprecipitated with T14/T46 antibodies and was separated by SDS-PAGE followed by gel excision and mass spectrometry analysis. In the absence of CBP, no acetylation was detected. In the presence of CBP, acetylation was detected on the four indicated lysine residues with significant ion scores and p-values shown in **(b)**. Acetylated K280 was detected on the peptide sequence VQIIN**K**K. The corresponding m/z spectrum is shown in **(c)** and ion scores are represented in Supplementary table S2.

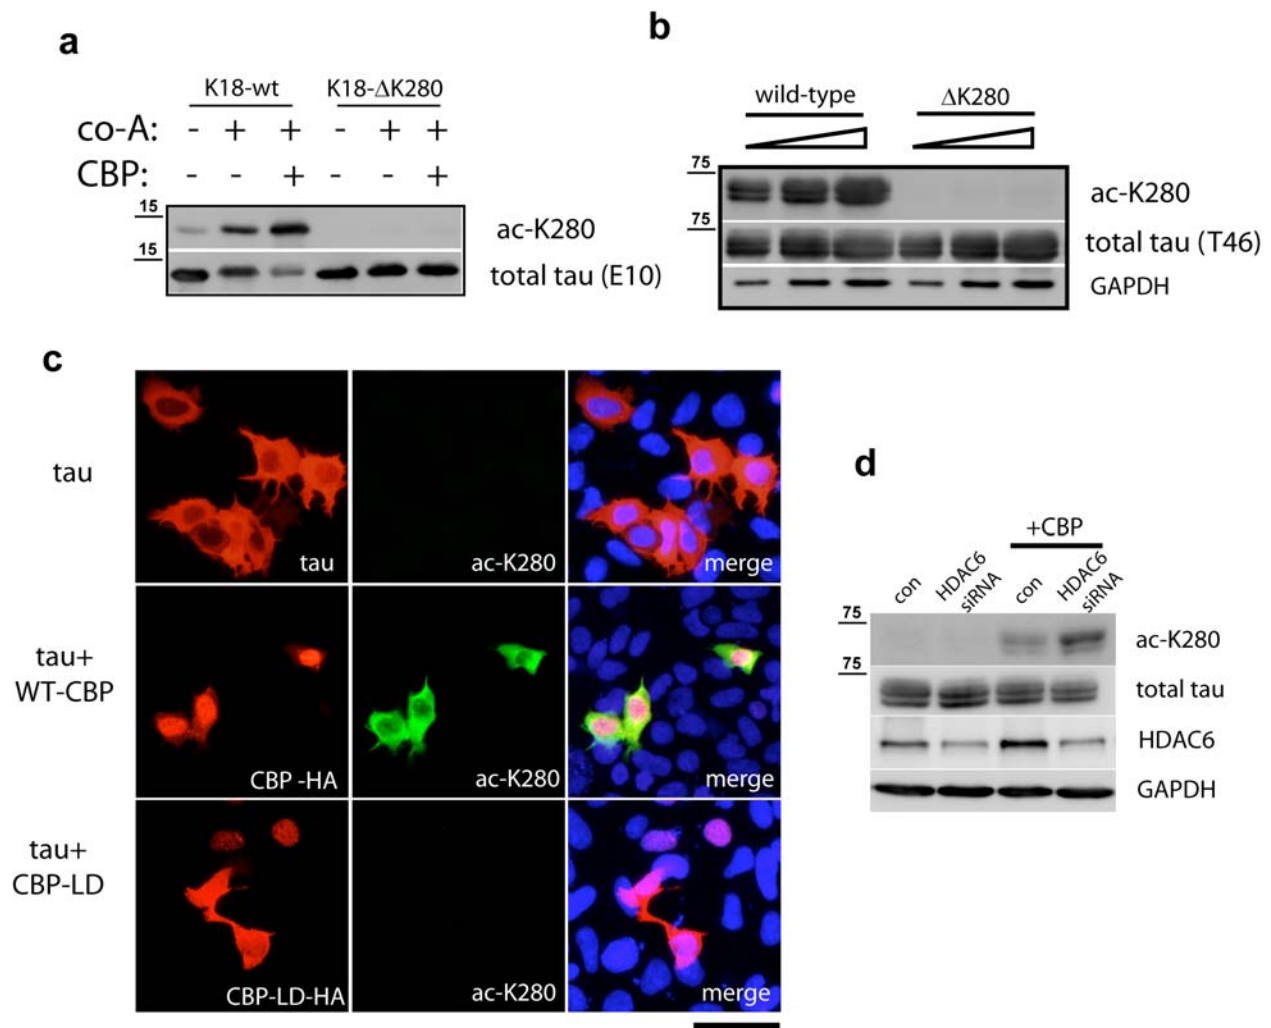

**Supplementary Figure S3: Characterization of the ac-K280 site-specific acetylated tau antibody.**

**a)** Recombinant WT-K18 or  $\Delta$ K280-K18 proteins (1  $\mu$ g) were incubated in the presence or absence of acetyl-CoA or CBP as indicated and K280 acetylation was determined by immunoblotting using anti-ac-K280 and a polyclonal antibody raised to exon 10 of tau protein (E10). **b)** QBI-293 cells were co-transfected with WT-T40 tau or  $\Delta$ K280-T40 mutant tau expression plasmids along with CBP to promote tau acetylation. 1, 2, and 5  $\mu$ g total cell lysates were analyzed by western blotting using anti-ac-K280, total tau (T46), and GAPDH antibodies. **c)** QBI-293 cells were transfected with WT-40, WT-CBP-HA, or enzyme-inactive CBP-LD-HA expression plasmids and analyzed by immunofluorescence using anti-tau (T46), monoclonal HA (Santa Cruz), or anti-ac-K280 antibodies. Note, ac-K280 reactivity is specifically detected in the presence of WT-CBP, but not the inactive mutant CBP-LD. Scale bar represents 50 $\mu$ m. **d)** Control or HDAC6 siRNA expressing HEK-T40 cells were analyzed by immunoblotting using ac-K280, total tau, HDAC6, and GAPDH antibodies.

PS19/PDAPP

---

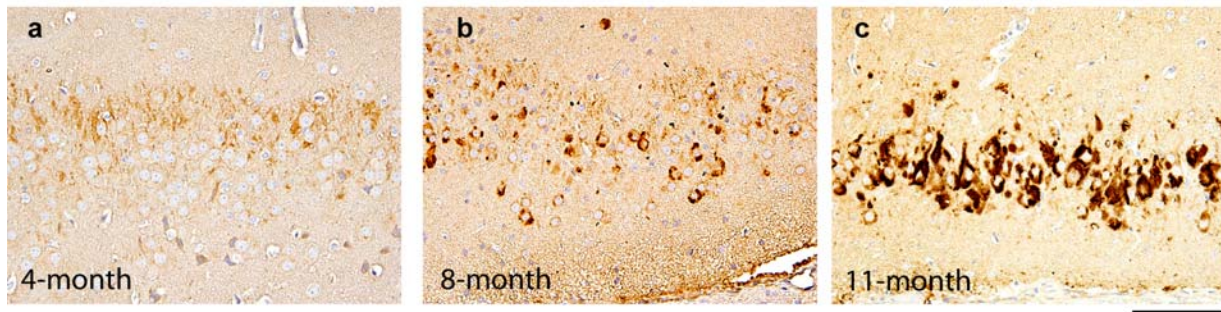

**Supplementary Figure S4: Ac-K280 pathology accumulates with age in PS19/PDAPP mice.**

**a-c)** Cortical brain sections from PS19/PDAPP mice at 4-month (panel **a**), 8-month (panel **b**), or 11-months (panel **c**) were analyzed by IHC using anti-ac-K280 antibody. Shown are representative images highlighting increased ac-K280 immuno-reactivity in older mice. Scale bar represents 100  $\mu$ M.

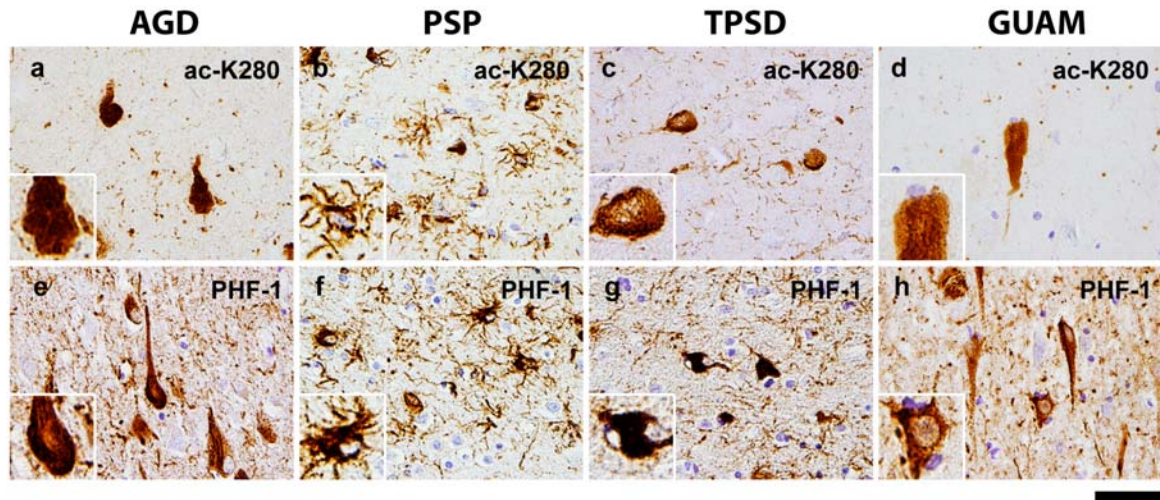

**Supplementary Figure S5: Ac-K280-positive tau inclusions are detected in a diverse set of human tauopathies**

**a-h)** Cortical brain sections from the indicated tauopathies were analyzed by IHC using anti-ac-K280 (panels **a-d**) and PHF-1 (panels **e-h**) antibodies. Shown are representative images highlighting NFTs and tau inclusions in each tauopathy. Scale bar represents 50  $\mu$ M, insets depict 60X magnification.

| <b>peptide sequence</b>    | <b>peptide lysine</b> | <b>tau residue #</b> | <b>ions score (&gt;40 sig.)</b> | <b>Expect (p-value)</b> |
|----------------------------|-----------------------|----------------------|---------------------------------|-------------------------|
| <b>TKIATPR</b>             | <b>K2</b>             | <b>K150</b>          | <b>34</b>                       | <b>0.12</b>             |
| <b>GAAPPGQKGQANATR</b>     | <b>K8</b>             | <b>K163</b>          | <b>106</b>                      | <b>5.30E-09</b>         |
| <b>IPAKTPPAPK</b>          | <b>K4</b>             | <b>K174</b>          | <b>47</b>                       | <b>0.0049</b>           |
| <b>TPPKSPSSAK</b>          | <b>K4</b>             | <b>K234</b>          | <b>46</b>                       | <b>0.0066</b>           |
| <b>TPPKSPSSAKSR</b>        | <b>K10</b>            | <b>K240</b>          | <b>47</b>                       | <b>0.0047</b>           |
| <b>SKIGSTENLK</b>          | <b>K2</b>             | <b>K259</b>          | <b>44</b>                       | <b>0.011</b>            |
| <b>HQPGGGKVQIINK</b>       | <b>K7</b>             | <b>K274</b>          | <b>76</b>                       | <b>6.20E-06</b>         |
| <b>VQIINKK</b>             | <b>K6</b>             | <b>K280</b>          | <b>46</b>                       | <b>0.0059</b>           |
| <b>VQIINKK</b>             | <b>K7</b>             | <b>K281</b>          | <b>44</b>                       | <b>0.0099</b>           |
| <b>KLDLSNVQSK</b>          | <b>K10</b>            | <b>K290</b>          | <b>61</b>                       | <b>0.00021</b>          |
| <b>HVPGGGSVQIVYKPVDSLK</b> | <b>K13</b>            | <b>K311</b>          | <b>58</b>                       | <b>0.00029</b>          |
| <b>IGSLDNITHVPGGGNKK</b>   | <b>K16</b>            | <b>K369</b>          | <b>73</b>                       | <b>1.00E-05</b>         |
| <b>TDHGAEIVYKSPVSGDTSR</b> | <b>K10</b>            | <b>K395</b>          | <b>56</b>                       | <b>0.00038</b>          |

**Supplementary Table S1: Mass spectrometry analysis identified tau acetylation sites from *in vitro* acetylated tau-T40.**

Recombinant CBP protein was incubated with 1 µg T40 and 0.4 mM acetyl-CoA in 30 µl of reaction buffer (50 mM Tris-HCl pH 8.0, 10% glycerol, 1 mM DTT, 100 mM EDTA, 1 mM phenylmethylsulfonyl fluoride) for 1 hr at 37°C. Acetylation was analyzed by SDS-PAGE and Coomassie staining followed by gel excision for mass spectrometry using LTQ XL\* Linear Ion Trap Mass Spectrometer (Thermo Scientific). Data was acquired using Xcalibur software (Thermo Scientific) and analyzed using Mascot software (Matrix Science).

| Monoisotopic mass of neutral peptide Mr(calc): 883.5491             |                 |                 |                |                  |                 |                 |                 |                  |      |                 |                 |                |                  |   |
|---------------------------------------------------------------------|-----------------|-----------------|----------------|------------------|-----------------|-----------------|-----------------|------------------|------|-----------------|-----------------|----------------|------------------|---|
| Variable modifications:                                             |                 |                 |                |                  |                 |                 |                 |                  |      |                 |                 |                |                  |   |
| K6 : Acetyl (K)                                                     |                 |                 |                |                  |                 |                 |                 |                  |      |                 |                 |                |                  |   |
| Ions Score: 44 Expect: 0.024                                        |                 |                 |                |                  |                 |                 |                 |                  |      |                 |                 |                |                  |   |
| Matches (Bold Red): 11/68 fragment ions using 14 most intense peaks |                 |                 |                |                  |                 |                 |                 |                  |      |                 |                 |                |                  |   |
| #                                                                   | a               | a <sup>**</sup> | a <sup>*</sup> | a <sup>***</sup> | b               | b <sup>**</sup> | b <sup>*</sup>  | b <sup>***</sup> | Seq. | y               | y <sup>**</sup> | y <sup>*</sup> | y <sup>***</sup> | # |
| 1                                                                   | 72.0808         | 36.544          |                |                  | 100.0757        | 50.5415         |                 |                  | V    |                 |                 |                |                  | 7 |
| 2                                                                   | 200.1394        | 100.5733        | 183.1128       | 92.06            | <b>228.1343</b> | 114.5708        | <b>211.1077</b> | 106.0575         | Q    | <b>785.488</b>  | 393.2476        | 768.4614       | 384.7343         | 6 |
| 3                                                                   | 313.2234        | 157.1153        | 296.1969       | 148.6021         | <b>341.2183</b> | 171.1128        | 324.1918        | 162.5995         | I    | <b>657.4294</b> | 329.2183        | 640.4028       | 320.7051         | 5 |
| 4                                                                   | <b>426.3075</b> | 213.6574        | 409.2809       | 205.1441         | 454.3024        | <b>227.6548</b> | 437.2758        | 219.1416         | I    | <b>544.3453</b> | 272.6763        | 527.3188       | 264.163          | 4 |
| 5                                                                   | 540.3504        | 270.6788        | 523.3239       | 262.1656         | 568.3453        | 284.6763        | 551.3188        | 276.163          | N    | <b>431.2613</b> | 216.1343        | 414.2347       | 207.621          | 3 |
| 6                                                                   | 710.4559        | 355.7316        | 693.4294       | 347.2183         | <b>738.4508</b> | 369.7291        | 721.4243        | 361.2158         | K    | <b>317.2183</b> | 159.1128        | 300.1918       | 150.5995         | 2 |
| 7                                                                   |                 |                 |                |                  |                 |                 |                 |                  | K    | 147.1128        | 74.06           | 130.0863       | 65.5468          | 1 |

### Supplementary Table S2: Ion scores from acetylated VQIINNK peptide identified by mass spectrometry analysis of tau in cells

Tau-T40 was immunoprecipitated with T14/T46 antibodies and separated by SDS-PAGE followed by gel excision and mass spectrometry analysis. Listed in the table above are the ion scores that correspond to the m/z spectrum depicted in Supplementary Figure 2. The numbers in red bold are statistically significant and confirm the presence of acetylation on Lys-280 (K280). These data were generated using Mascot software (Matrix Science).
